# Supplementary material
Source: PubMed Central journal article supplement (PMC522010)
Supplement: pnas_101_41_14943__1.pdf [file pnas_101_41_14943__1.pdf]

## Supporting Text

**Detailed Learning Rule and Parameters.** The 100 excitatory synapses follow the calcium-dependent plasticity rule,

$$\frac{dw_i}{dt} = \eta([\text{Ca}]_i) [\Omega([\text{Ca}]_i) - \lambda w_i], \quad (1)$$

where  $w_i$  is the weight of synapse  $i$ ,  $i = 1, 2, \dots, 100$ . The learning curve  $\Omega$  is a difference of sigmoids,

$$\Omega([\text{Ca}]_i) = \sigma([\text{Ca}]_i, \alpha_1, \beta_1) - 0.5 \times \sigma([\text{Ca}]_i, \alpha_2, \beta_2), \quad (2)$$

with  $\sigma(x, a, b) = \exp(b(x - a)) / [1 + \exp(b(x - a))]$  and  $(\alpha_1, \beta_1, \alpha_2, \beta_2) = (0.25, 60, 0.4, 20)$ . The precise shape of  $\Omega$  does not qualitatively affect the results of our simulations, as long as the U-shaped dependence on calcium is maintained. The learning rate  $\eta$  depends linearly on calcium,  $\eta([\text{Ca}]_i) = 2 \times 10^{-5} [\text{Ca}]_i$ , so potentiation occurs faster than depression. For the sake of simulation times, we set  $\eta([\text{Ca}]_i) = 2 \times 10^{-3} [\text{Ca}]_i$  in the simulations showing input selectivity. We have verified that the fixed point is not altered as long as the rate of homeostasis is multiplied by the same factor. Finally,  $\lambda = 0.005$  is the synaptic decay.

The local NMDAR-mediated calcium concentration follows a first-order linear differential equation,

$$\frac{d[\text{Ca}]_i}{dt} = I - \frac{[\text{Ca}]_i}{\tau}, \quad (3)$$

where  $I$  is the *N*-methyl-D-aspartate (NMDAR) calcium current and  $\tau = 20$  ms is the calcium passive decay time constant.  $I$  depends on the association between presynaptic spike times and postsynaptic depolarization level as  $I_i = g f_i(t) H(V)$ , where  $f$  describes the dynamics of the glutamate-receptor interaction,  $H$  describes the voltage-dependent

magnesium-block of the NMDAR, and  $g$  is the NMDAR conductance. Upon a prespike,  $f$  reaches its peak value of one. 70% of this value decays with a fast time constant  $\tau_f^N = 50\text{ms}$  and the remainder decays with a slower time constant  $\tau_s^N = 200\text{ms}$ .  $H$  is given by

$$H(V) = \frac{V - V_{rev}}{1 + e^{-0.062V / 3.57}}, \quad (4)$$

with reversal potential for calcium  $V_{rev} = 130\text{mV}$ . The contribution of the local depolarization to the  $H$ -function is negligible compared to the back-propagating action potentials (BPAP), so here we use  $V = V_{rest} + \text{BPAP}(t)$ .

**Integrate-and-Fire Model.** An integrate-and-fire model simulates the dynamics of the somatic membrane potential

$$\frac{dV_m(t)}{dt} = \frac{1}{\tau_m} \{V_{rest} - V_m(t) + G_{ex}(t)[V_{ex} - V_m(t)] + G_{in}(t)[V_{in} - V_m(t)]\}, \quad (5)$$

where  $\tau_m = 20\text{ms}$  is the membrane time constant,  $V_{ex} = 0$ ,  $V_{in} = 65\text{mV}$  and  $V_{rest}$  is the resting membrane potential. To simulate spike-frequency adaptation,  $V_{rest}$  is decreased by  $2\text{mV}$  upon a postsynaptic spike and decays back to the baseline value of  $-65\text{mV}$ , with a time constant of  $100\text{ms}$ . If a presynaptic spike arrives at the excitatory [inhibitory] synapse  $i$ ,  $G_{ex[in]}(t) = G_{ex[in]}(t-1) + s_i g_{ex[in]}^{\max}$ , otherwise,  $G_{ex}$  and  $G_{in}$  decay exponentially with a time constant  $\tau_g = 5\text{ms}$ . For excitatory synapses,  $(s_i, g_{ex}^{\max}) = (w_i, 0.03)$ , while for inhibitory synapses,  $(s_i, g_{in}^{\max}) = (1, 0.1)$ . If  $V_m$  reaches the firing threshold of  $-55\text{mV}$ , a postsynaptic spike is generated and  $\text{BPAP}(t)$  is updated to its peak value of  $42\text{mV}$ . 75% of this value decays rapidly ( $\tau_f^B = 3\text{ms}$ ) and the remainder decays slowly ( $\tau_s^B = 35\text{ms}$ ).

**Implementation of Stabilization.** The biophysical model of stabilization can be implemented through a kinetic model for insertion and removal of NMDARs:

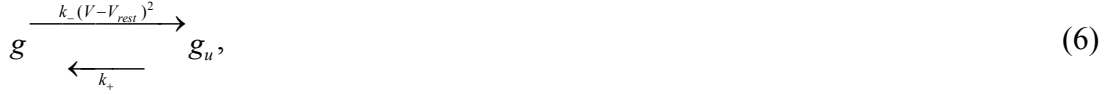

where  $g$  is the amount of NMDARs at the synapses,  $g_u$  is the amount of unused NMDARs from the internal pool,  $k_-(V-V_{rest})^\alpha$  and  $k_+$  are the kinetic constants of removal and insertion, respectively. As before,  $V = V_{rest} + \text{BPAP}(t)$ . If the number of receptors is proportional to their effective conductance, we can write the dynamic equation for the NMDAR conductance,

$$\frac{dg}{dt} = -[k_-(V - V_{rest})^2 + k_+]g + k_+g_t,
 \tag{7}$$

with the normalization factor  $g_t = g + g_u$ ,  $g_t = 4.5 \times 10^{-3} \mu\text{M}/(\mu\text{V}\cdot\text{ms})$ ,  $k_- = 8 \times 10^{-9} \text{ms}^{-1}$  and  $k_+ = 8 \times 10^{-7} \text{ms}^{-1}$ , except for the input selectivity simulations for which  $k_- = 8 \times 10^{-7} \text{ms}^{-1}$ ,  $k_+ = 8 \times 10^{-5} \text{ms}^{-1}$  (see above). The results are not sensitive to the detailed functional form of the voltage-dependent transition rate.

1. Jahr, C. E. & Stevens, C. F. (1990) *J. Neurosci.* **10**, 3178-3182.
